# Supplementary material for: ATRA-Induced Cellular Differentiation and CD38 Expression Inhibits Acquisition of BCR-ABL Mutations for CML Acquired Resistance
Source: PLoS Genet. 2014 Jun 26;10(6):e1004414. doi: 10.1371/journal.pgen.1004414 (PMC4072521; doi:10.1371/journal.pgen.1004414)
Supplement: Table S4 — Coding exon indels specific in KCL-22M cells. (XLS) [file pgen.1004414.s010.xls]

## Sheet: Sheet1
chromosome	position	referenceBase	sampleGenotype	sampleAlleles	accession	geneList	functionGVS	scorePhastCons	consScoreGERP	repeatMasker	tandemRepeat	distanceToSplice
8	131964220	G	D1	-G	NM_001115	ADCY8	frameshift	0.202	-10.4	NA	NA	24
6	16327829	G-A	I1	+G	NM_000332	ATXN1	frameshift	0.999	5.27	NA	NA	872
6	16327829	G-A	I1	+G	NM_001128164	ATXN1	frameshift	0.999	5.27	NA	NA	872
7	134363779	A	D1	-A	NM_001724	BPGM	frameshift	0.682	3.83	NA	NA	176
7	134363779	A	D1	-A	NM_199186	BPGM	frameshift	0.682	3.83	NA	NA	176
19	14023189	C	D1	-C	NM_017721	CC2D1A	frameshift	0.549	1.54	NA	NA	55
15	55677912	C	D1	-C	NM_001204450	CCPG1	splice-3	0.996	5.15	NA	NA	0
15	55677912	C	D1	-C	NM_001204451	CCPG1	splice-3	0.996	5.15	NA	NA	0
15	55677912	C	D1	-C	NM_004748	CCPG1	splice-3	0.996	5.15	NA	NA	0
15	55677912	C	D1	-C	NM_020739	CCPG1	splice-3	0.996	5.15	NA	NA	0
11	118220590	A	D1	-A	NM_000073	CD3G	frameshift	0	-8.64	NA	NA	95
19	45556134	C	D1	-C	NM_007056	CLASRP	frameshift	0.89	4.37	NA	NA	16
12	10131967	A-T	I1	+A	NM_001207010	CLEC12A	frameshift	0	0.486	NA	NA	33
12	10131967	A-T	I1	+A	NM_138337	CLEC12A	frameshift	0	0.486	NA	NA	33
12	10131967	A-T	I1	+A	NM_201623	CLEC12A	frameshift	0	0.486	NA	NA	33
5	149441307	G	D1	-G	NM_005211	CSF1R	frameshift	0.99	-0.552	NA	NA	23
6	30863257	C-A	I1	+C	NM_013993	DDR1	frameshift	1	5.1	NA	NA	34
6	30863257	C-A	I1	+C	NM_013994	DDR1	frameshift	1	5.1	NA	NA	34
19	49982173	C	D1	-C	NM_001204502	FLT3LG	frameshift	1	1	NA	NA	9
19	49982173	C	D1	-C	NM_001204503	FLT3LG	frameshift	1	1	NA	NA	9
19	49982173	C	D1	-C	NM_001459	FLT3LG	frameshift	1	1	NA	NA	9
19	19753423	G	D1	-G	NM_016573	GMIP	frameshift	0.009	-7.37	NA	NA	5
5	41000858	A	D1	-A	NM_173489	HEATR7B2	frameshift	0.527	-0.678	NA	NA	77
2	75104382	G	D1	-G	NM_000189	HK2	frameshift	1	3.19	NA	NA	66
12	121432124	C	D1	-C	NM_000545	HNF1A	frameshift	0.038	4.67	NA	NA	84
3	49167130	C	D1	-C	NM_002292	LAMB2	frameshift	0.708	5.3	NA	NA	19
7	107763589	A	D1	-A	NM_007356	LAMB4	frameshift	0	2.19	NA	NA	15
19	12760819	C	D1	-C	NM_000528	MAN2B1	frameshift	0.996	3.82	NA	NA	9
19	12760819	C	D1	-C	NM_001173498	MAN2B1	frameshift	0.996	3.82	NA	NA	9
2	71376359	A	D1	-A	NM_005791	MPHOSPH10	frameshift	1	5.64	NA	NA	8
8	125568095	C	D1	-C	NM_014751	MTSS1	frameshift	0.918	5.2	NA	NA	50
11	74716622	C	D1	-C	NM_006656	NEU3	frameshift	1	5.14	NA	NA	166
10	103543117	A-C	I1	+A	NM_006993	NPM3	frameshift	0.007	2.69	NA	NA	88
11	63994490	G	D1	-G	NM_001128612	NUDT22	frameshift	0.996	4.55	NA	NA	114
11	63994490	G	D1	-G	NM_001128613	NUDT22	frameshift	0.996	4.55	NA	NA	114
11	63994490	G	D1	-G	NM_032344	NUDT22	frameshift	0.996	4.55	NA	NA	114
1	204416643	G	D1	-G	NM_002646	PIK3C2B	frameshift	1	4.17	NA	NA	63
11	74336616	A	D1	-A	NM_006591	POLD3	frameshift-near-splice	1	4.75	NA	NA	2
1	71512617	C	D1	-C	NM_001126044	PTGER3	frameshift	0.117	3.2	NA	NA	255
1	71512617	C	D1	-C	NM_198714	PTGER3	frameshift	0.117	3.2	NA	NA	255
1	71512617	C	D1	-C	NM_198715	PTGER3	frameshift	0.117	3.2	NA	NA	255
1	71512617	C	D1	-C	NM_198716	PTGER3	frameshift	0.117	3.2	NA	NA	255
1	71512617	C	D1	-C	NM_198717	PTGER3	frameshift	0.117	3.2	NA	NA	255
1	71512617	C	D1	-C	NM_198718	PTGER3	frameshift	0.117	3.2	NA	NA	255
1	71512617	C	D1	-C	NM_198719	PTGER3	frameshift	0.117	3.2	NA	NA	255
4	87724950	A-T	I1	+A	NM_006264	PTPN13	frameshift	0.33	1.12	NA	NA	60
4	87724950	A-T	I1	+A	NM_080683	PTPN13	frameshift	0.33	1.12	NA	NA	60
4	87724950	A-T	I1	+A	NM_080684	PTPN13	frameshift	0.33	1.12	NA	NA	60
4	87724950	A-T	I1	+A	NM_080685	PTPN13	frameshift	0.33	1.12	NA	NA	60
2	17698742	T	D1	-T	NM_001099218	RAD51AP2	frameshift	0.908	3.55	NA	NA	2308
2	114500284	AA	D2	-AA	NM_025181	SLC35F5	frameshift	1	5	NA	NA	17
1	115537609	A	D1	-A	NM_003176	SYCP1	frameshift	1	1.55	NA	NA	108
19	56173911	G	D1	-G	NM_001012478	U2AF2	frameshift	0.991	-1.03	NA	NA	45
19	56173911	G	D1	-G	NM_007279	U2AF2	frameshift	0.991	-1.03	NA	NA	45
9	138837013	G	D1	-G	NM_016172	UBAC1	frameshift	0	-6.35	NA	NA	83
19	44050080	G	D1	-G	NM_006297	XRCC1	frameshift	0.075	4.03	NA	NA	29
